# Supplementary material for: Silver(i) coordination polymers based on halogenated cyanoformamidine: roles of oxyanions and halogen atoms in the structural diversity
Source: Royal Society of Chemistry journal article supplement (doi:10.1039/d1ce00025j), 2021-01-01
Supplement: d1ce00025j1.pdf [file d1ce00025j1.pdf]

## Electronic Supporting Information

### **Silver(I) Coordination Polymers Based on Halogenated Cyanoforamidine: Roles of Oxyanions and Halogen Atoms in the Structural Diversity**

Fu-Hung Cheng,<sup>a</sup> Yu-Hsiang Liu,<sup>a</sup> Wei-Te Lee,<sup>a</sup> Ji-Hong Hu,<sup>a</sup> Hui-Ling  
Hu,<sup>b</sup> Pradhumna Mahat Chhetri\*<sup>c</sup> and Jhy-Der Chen\*<sup>a</sup>

<sup>a</sup>Department of Chemistry, Chung-Yuan Christian University, Chung-Li,  
Taiwan, R.O.C.

<sup>b</sup>Department of Environmental Technology and Management, Nanya  
Institute of Technology, Chung-Li, Taiwan, R.O.C

<sup>c</sup>Department of Chemistry, Amrit Campus, Tribhuvan University,  
Kathmandu, Nepal

**Fig. S1.** The PXRD patterns for **1**.

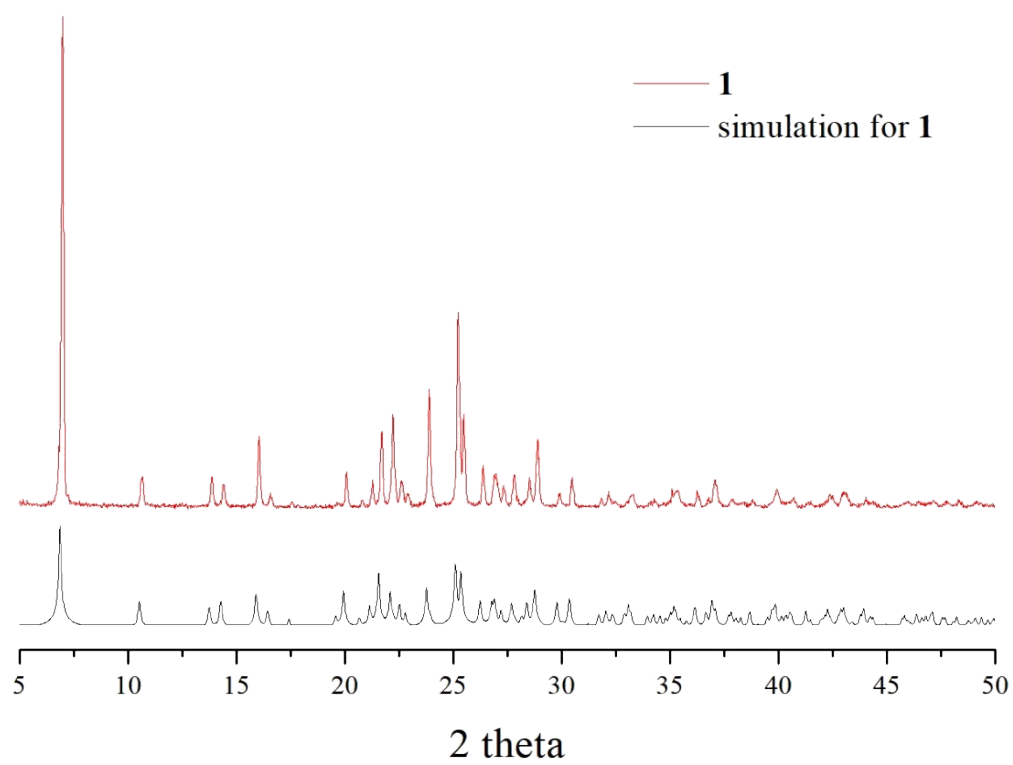

**Fig. S2.** The PXRD patterns for **2**.

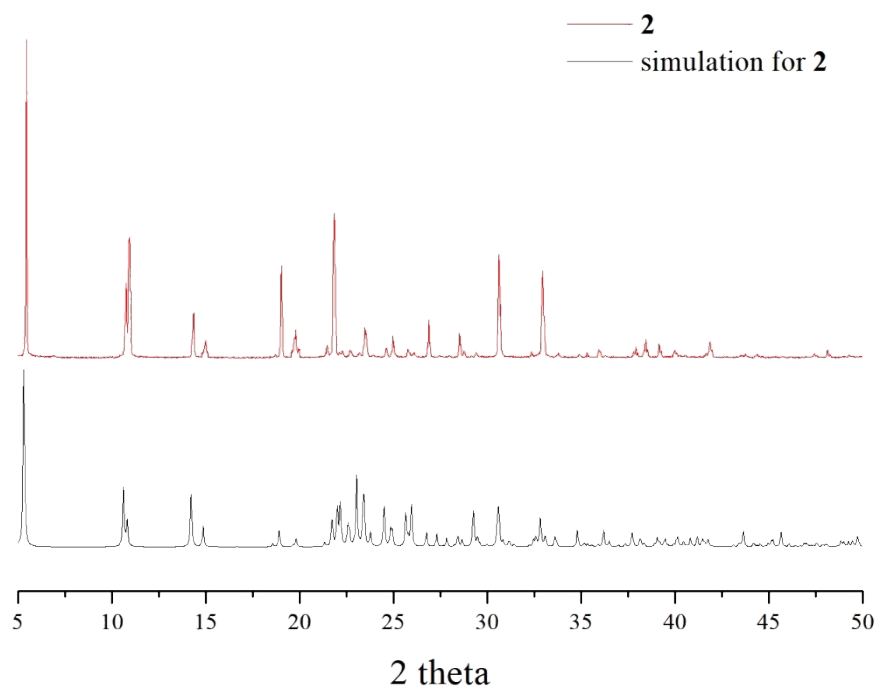

**Fig. S3.** The PXRD patterns for **3**.

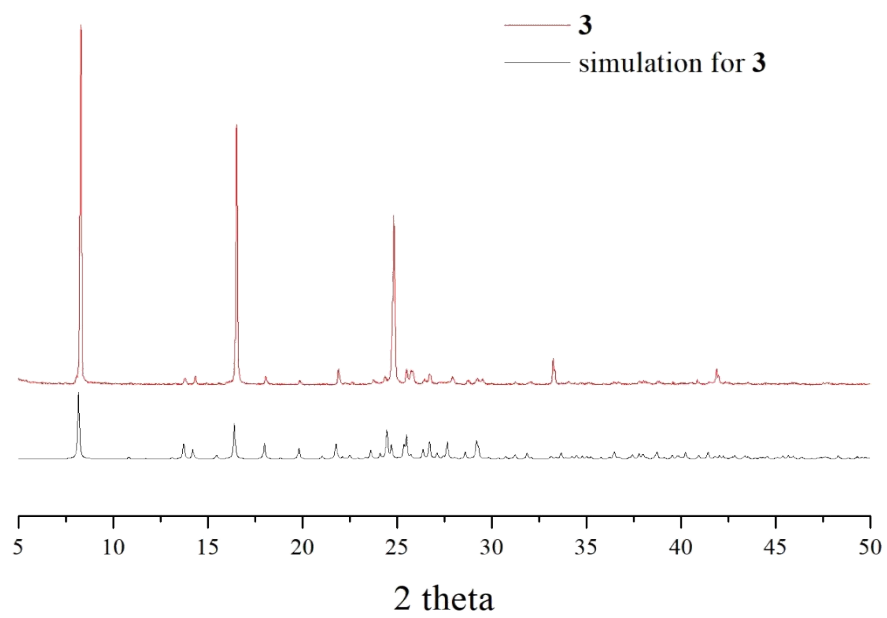

**Fig. S4.** The PXRD patterns for **4**.

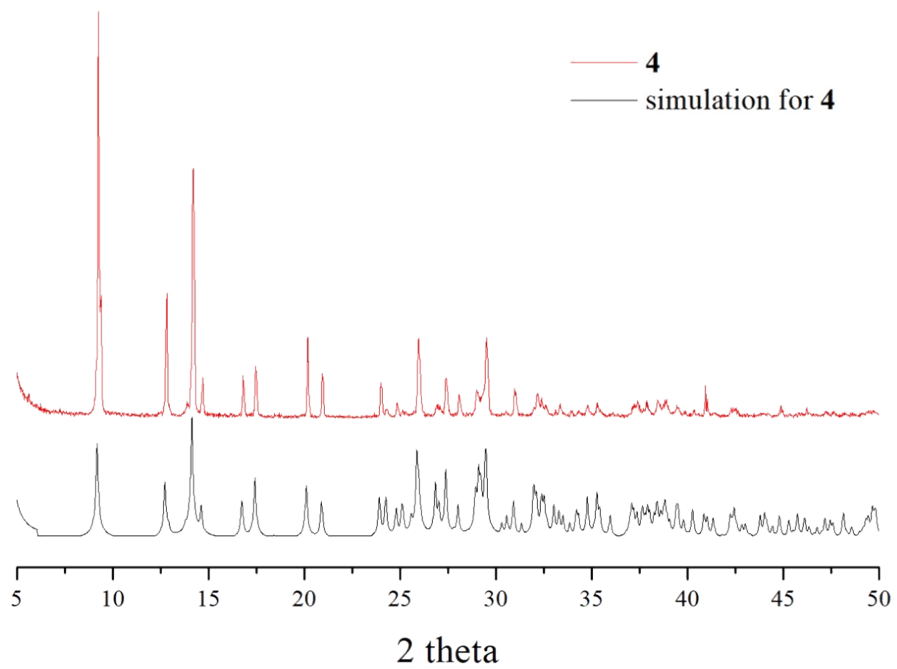

**Fig. S5.** The PXRD patterns for **5**.

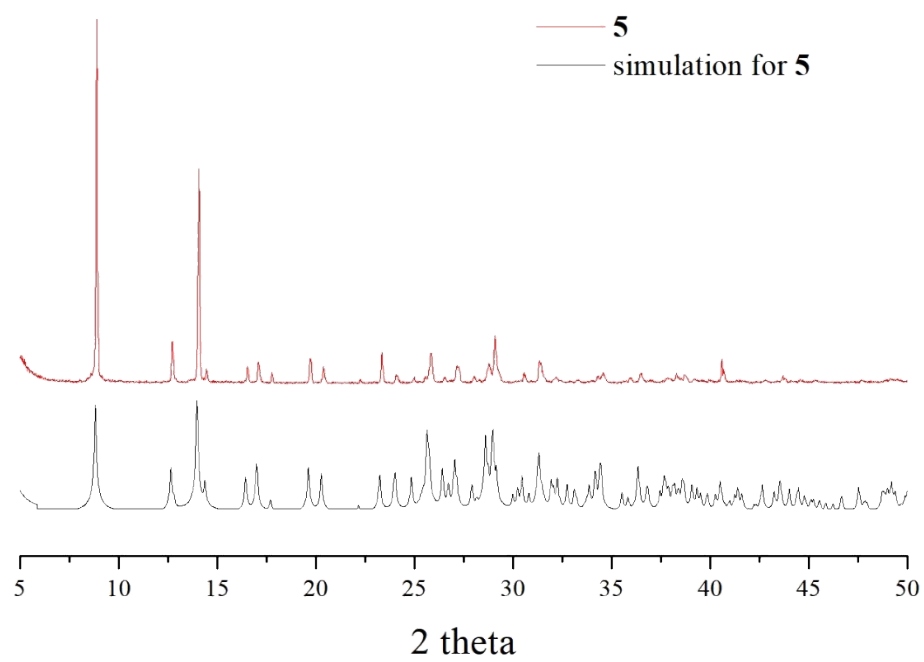

**Fig. S6.** The PXRD patterns for **6**.

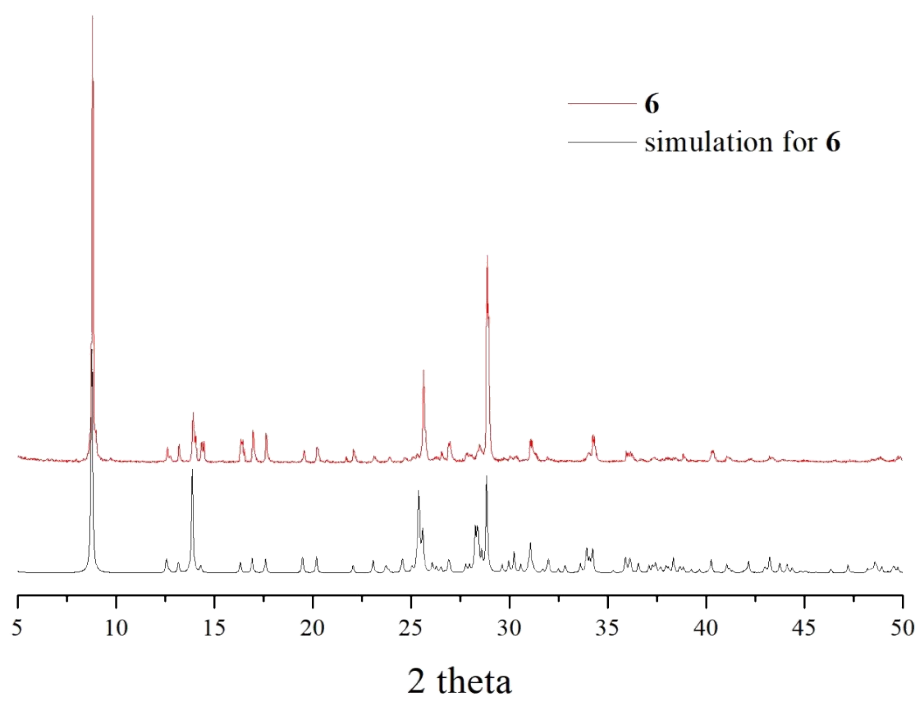

**Fig. S7.** Hirshfeld surfaces and fingerprint plots for O-H interaction (a) **4**, (b) **5** and (c) **6**.

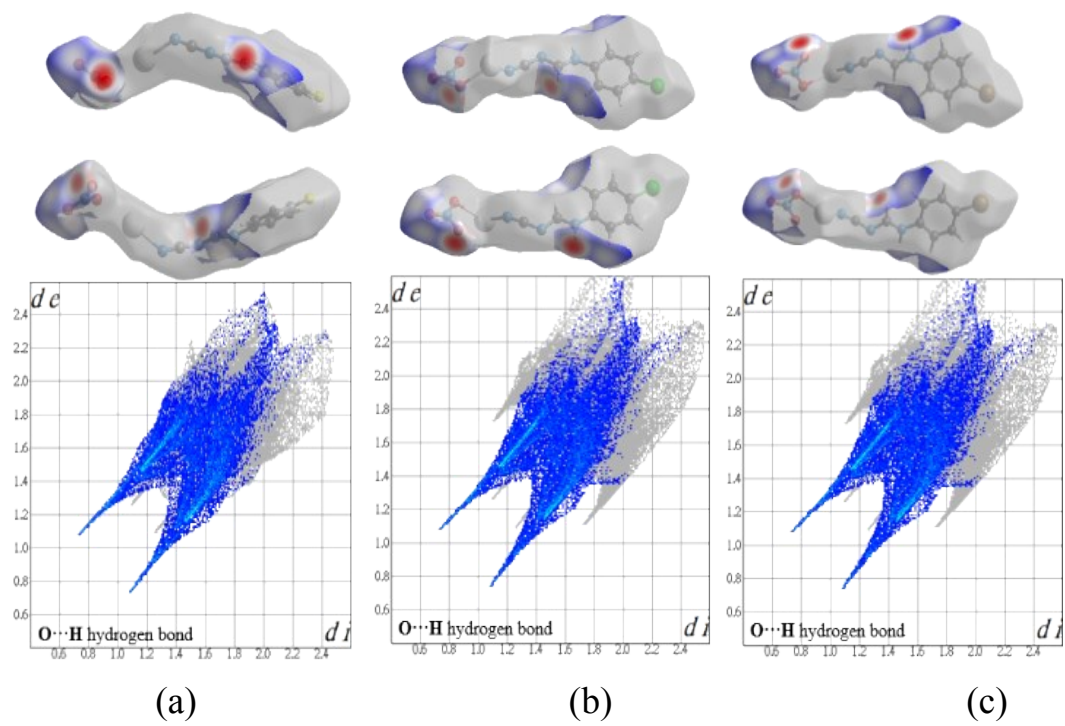



**Fig. S8.** Fingerprint plots for Ag-Ag interaction (above) and X-H interaction (below) (a) **4**, (b) **5** and (c) **6**.

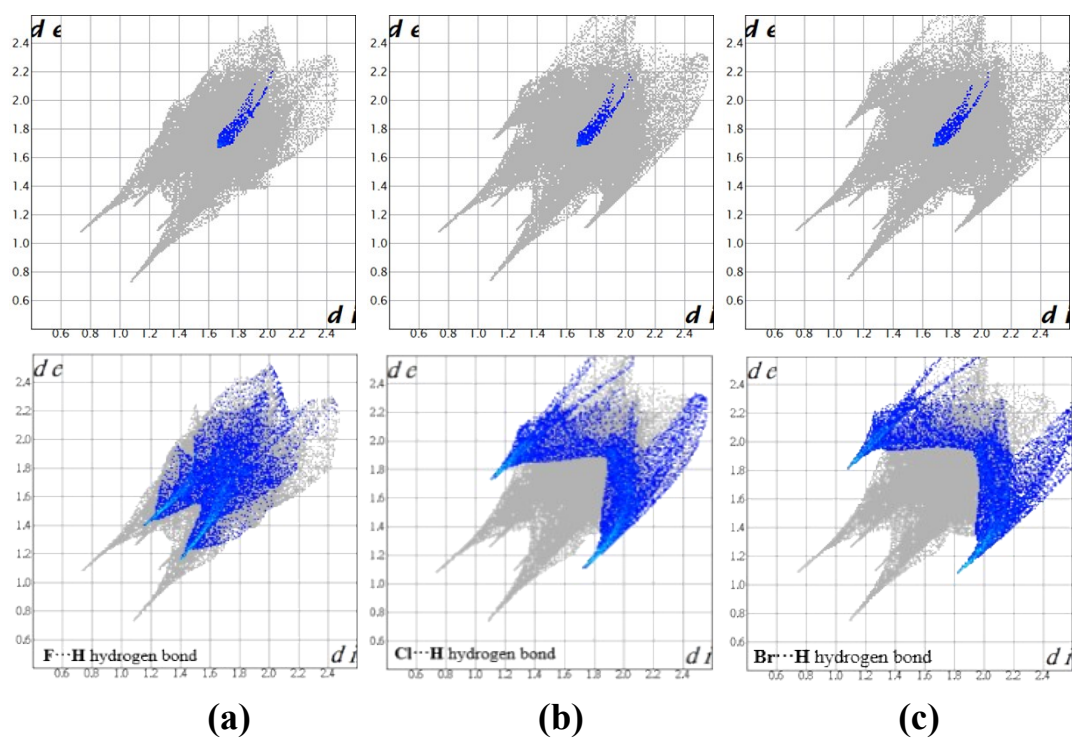

**Fig. S9.** Hirshfeld surfaces and fingerprint plots for Ag-O interaction (a) 4, (b) 5 and (c) 6.

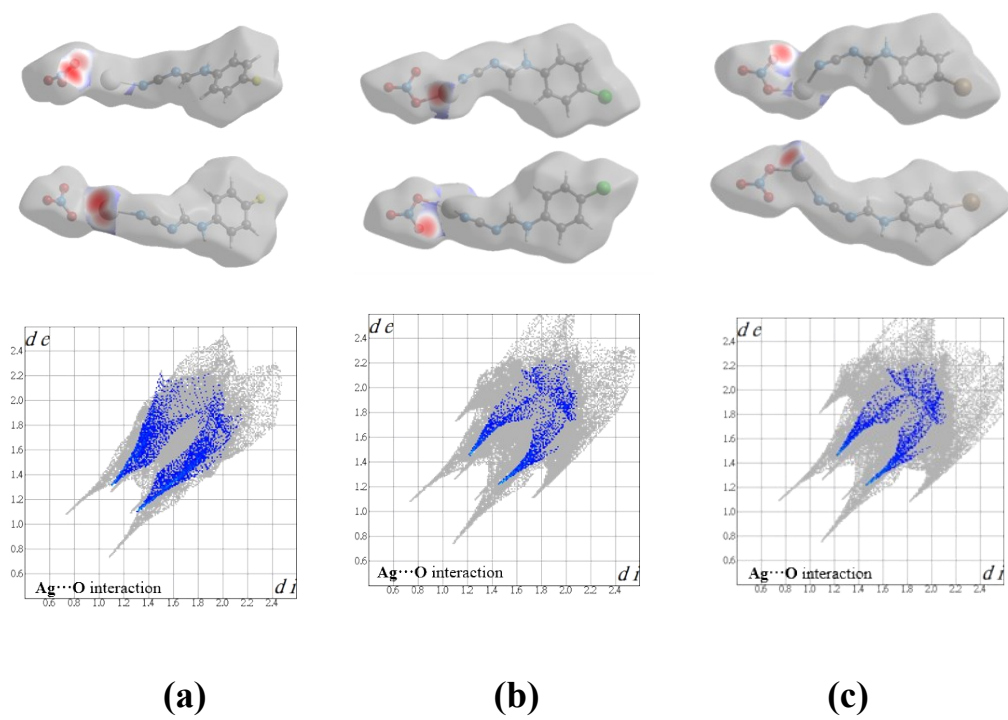

**Fig. S10.** Hirshfeld surfaces and fingerprint plots for  $\pi$ -- $\pi$  interaction (a) 4, (b) 5 and (c) 6.

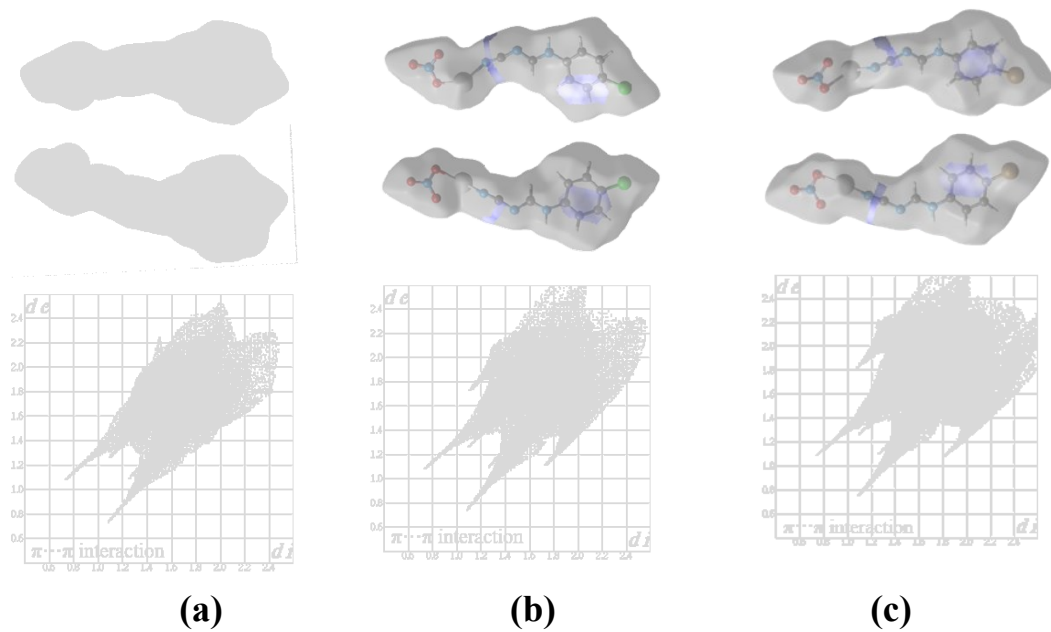

**Fig. S11.** Hirshfeld surfaces for X-H interaction (a) **4**, F-H (b) **5** Cl-H and (c) **6**. Br-H interaction.

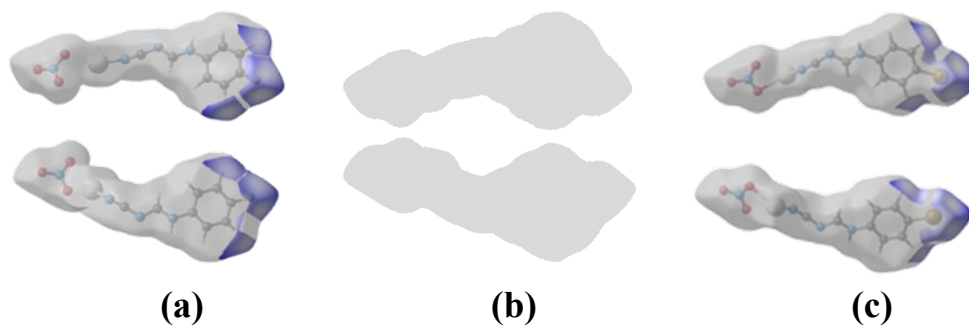

**Fig. S12.** Crystal void (isovalue 0.002 e au<sup>-3</sup>) along a-axis for (a) **4**, (b) **5** and (c) **6**.

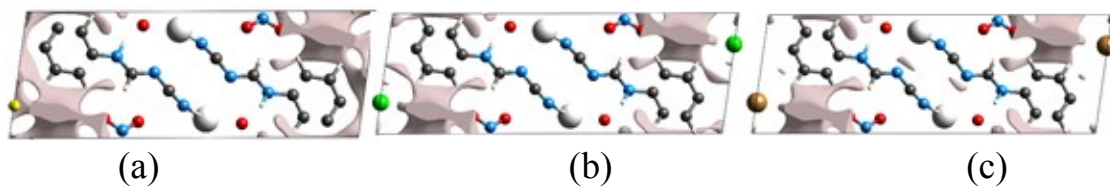

**Fig. S13.** Hirshfeld surfaces for Ag-Ag interaction (a) **4**, (b) **5** and (c) **6**.

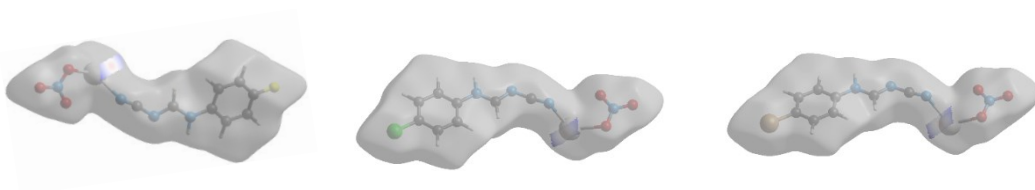

**Fig. S14.** Uv-Vis spectra of the free ligands in ethanol.

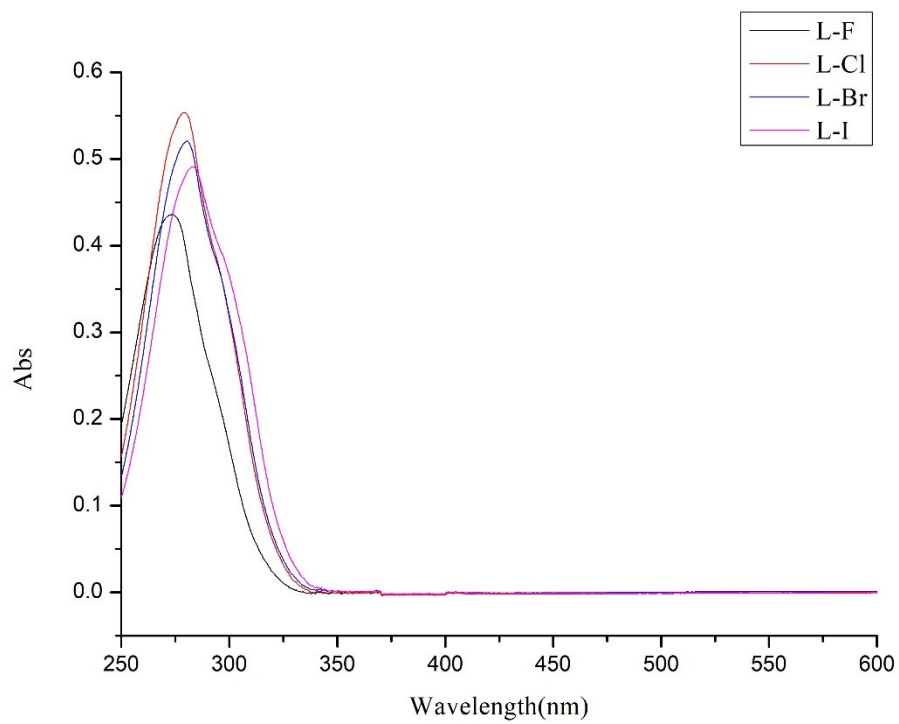

**Fig. S15.** Solid state UV-vis absorption spectra for ligands and complexes

**1 – 3.**

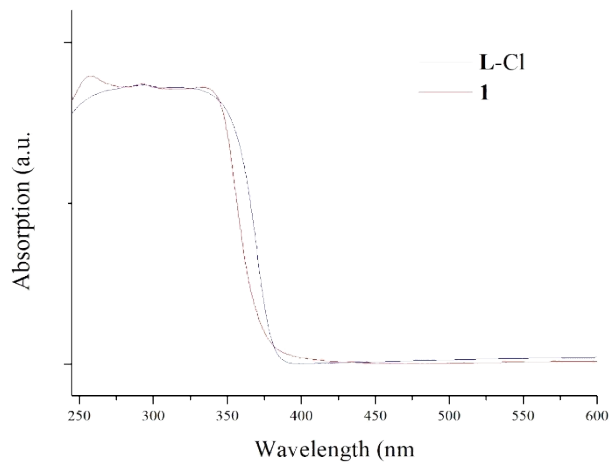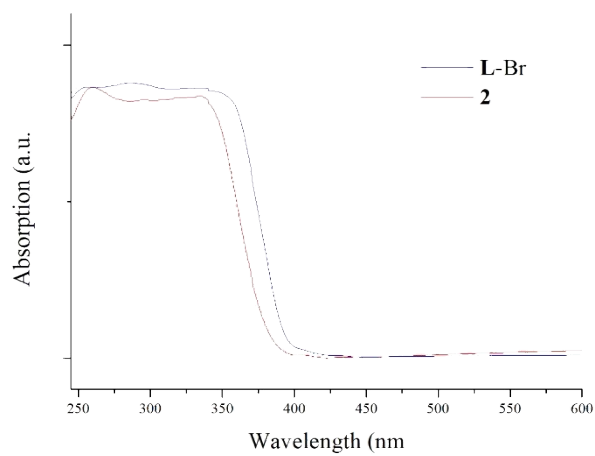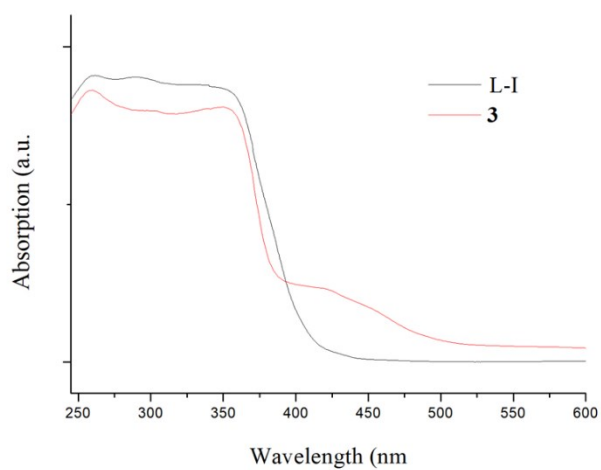



**Fig. S16.** Solid state UV-vis absorption spectra for ligands and complexes **4** – **6**.

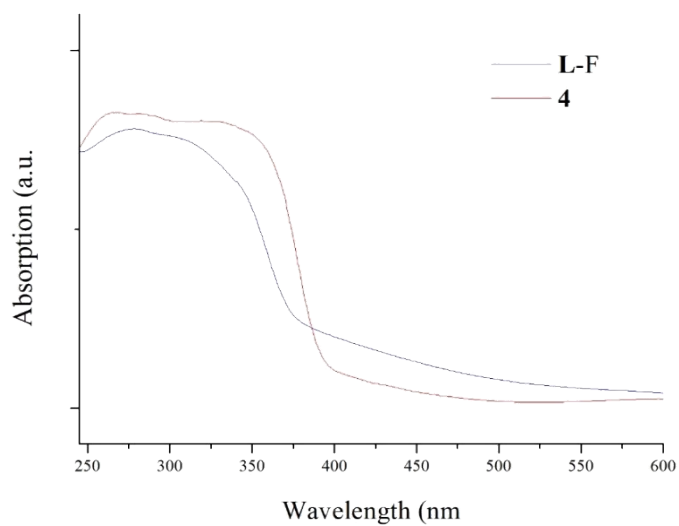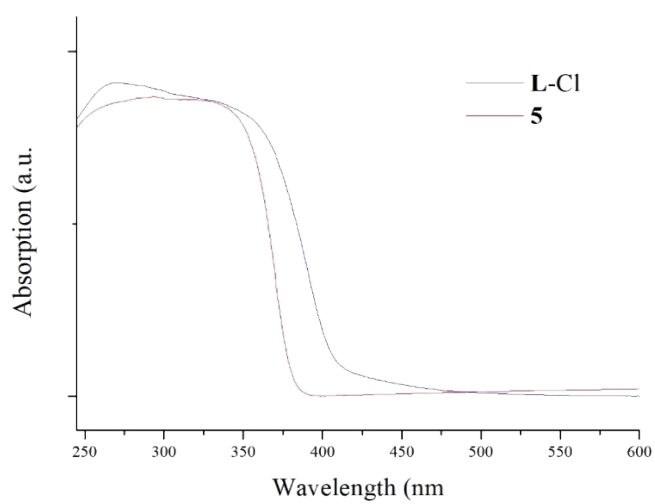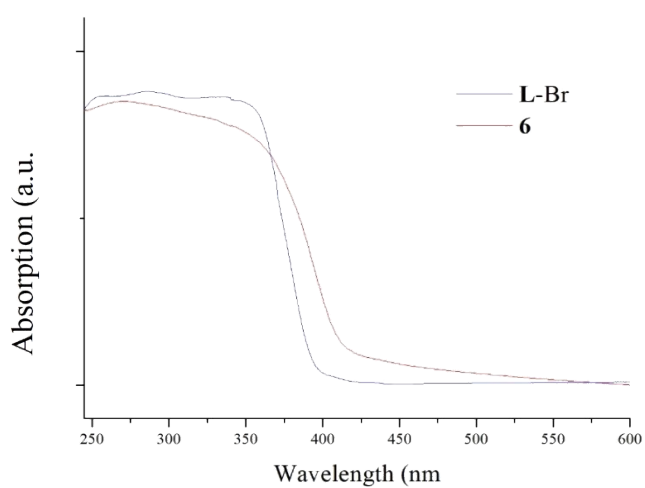

**Table S1.** Selected distances (Å) and angles (°) of the weak C-H---X hydrogen bonds in **4** – **6**.

|                                                 |        | <b>4</b>  |          |                                                                                                        |
|-------------------------------------------------|--------|-----------|----------|--------------------------------------------------------------------------------------------------------|
| C-H---F                                         | H---F  | ∠C-H---F  | C---F    |                                                                                                        |
| C(7) <sup>i</sup> -H(7A) <sup>i</sup> ---F      | 2.725  | 160.18    | 3.615(6) |                                                                                                        |
| C(5) <sup>ii</sup> -H(5A) <sup>ii</sup> ---F    | 2.788  | 131.18    | 3.472(5) | Sy                                                                                                     |
| C(5) <sup>iii</sup> -H(5A) <sup>iii</sup> ---F  | 2.873  | 146.42    | 3.684(5) | mm                                                                                                     |
|                                                 |        | <b>5</b>  |          | etry                                                                                                   |
| C-H---Cl                                        | H---Cl | ∠C-H---Cl | C---Cl   | cod                                                                                                    |
| C(5) <sup>i</sup> -H(5A) <sup>i</sup> ---Cl     | 3.063  | 155.62    | 3.929(5) | e: (i)                                                                                                 |
| C(7) <sup>ii</sup> -H(7A) <sup>ii</sup> ---Cl   | 3.174  | 129.51    | 3.834(5) | 1 –                                                                                                    |
| C(7) <sup>iii</sup> -H(7A) <sup>iii</sup> ---Cl | 3.000  | 154.06    | 3.859(5) | x, 1                                                                                                   |
|                                                 |        | <b>6</b>  |          | – y,                                                                                                   |
| C-H---Br                                        | H---Br | ∠C-H---Br | C---Br   | – z;                                                                                                   |
| C(5) <sup>i</sup> -H(5A) <sup>i</sup> ---Br     | 3.142  | 155.33    | 4.008(7) | (ii)                                                                                                   |
| C(7) <sup>ii</sup> -H(7A) <sup>ii</sup> ---Br   | 3.293  | 129.36    | 3.949(6) | 1 –                                                                                                    |
| C(7) <sup>iii</sup> -H(7A) <sup>iii</sup> ---Br | 3.068  | 154.94    | 3.930(7) | x, –                                                                                                   |
|                                                 |        |           |          | y, –                                                                                                   |
|                                                 |        |           |          | z;                                                                                                     |
|                                                 |        |           |          | (iii)                                                                                                  |
|                                                 |        |           |          | 2-x,                                                                                                   |
|                                                 |        |           |          | – y, –                                                                                                 |
|                                                 |        |           |          | z, for <b>4</b> and <b>5</b> . (i) 1 – x, 2 – y, 2 – z; (ii) 1 – x, 3 – y, 2 – z; (iii) –x, 3 – y, 2 – |
|                                                 |        |           |          | z, for <b>6</b> .                                                                                      |

**Table S2.** Selected bond lengths (Å) and angles (°) for **1 - 3**.

---

|            | <b>1</b> | <b>2</b> | <b>3</b> |
|------------|----------|----------|----------|
| N(1)-C(1)  | 1.143(5) | 1.141(6) | 1.157(8) |
| N(2)-C(1)  | 1.332(5) | 1.328(6) | 1.308(8) |
| N(2)-C(2)  | 1.328(4) | 1.325(5) | 1.296(7) |
| N(3)-C(2)  | 1.295(4) | 1.291(5) | 1.305(7) |
| N(3)-C(3)  | 1.418(4) | 1.416(5) | 1.409(7) |
| N(4)-C(9)  |          |          | 1.137(8) |
| N(5)-C(9)  |          |          | 1.304(8) |
| N(5)-C(10) |          |          | 1.288(8) |
| N(6)-C(10) |          |          | 1.303(7) |
| N(6)-C(11) |          |          | 1.422(8) |

---

**Table S3.** Selected bond lengths (Å) and angles (°) for **4 - 6**.

---

|           | <b>4</b> | <b>5</b> | <b>6</b> |
|-----------|----------|----------|----------|
| N(1)-C(1) | 1.155(4) | 1.154(6) | 1.143(7) |
| N(2)-C(1) | 1.313(4) | 1.315(6) | 1.307(8) |
| N(2)-C(2) | 1.321(4) | 1.320(6) | 1.312(9) |
| N(3)-C(2) | 1.306(4) | 1.308(6) | 1.297(7) |
| N(3)-C(3) | 1.418(4) | 1.427(5) | 1.420(8) |

---
